# Supplementary material
Source: PubMed Central journal article supplement (PMC3160183)
Supplement: emboj2011208s1.pdf [file emboj2011208s1.pdf]

**SUPPLEMENTARY DATA accompanying EMBO JOURNAL paper 2011**

**TITLE: THE CRYSTAL STRUCTURE OF YEAST CCT REVEALS  
INTRINSIC ASYMMETRY OF EUKARYOTIC CYTOSOLIC  
CHAPERONINS**

**Authors: Carien Dekker, S.Mark Roe, Elizabeth A. McCormack, Fabienne  
Beuron, Laurence H. Pearl & Keith R. Willison**

CONTENTS

|                                                            |                                                         |
|------------------------------------------------------------|---------------------------------------------------------|
| Supplementary Table I                                      | Data collection statistics                              |
| Supplementary Table II                                     | Signature residues per subunit and per domain           |
| Supplementary Figure S1                                    | Purification of CCT rabbit $\alpha$ -actin Plp2 complex |
| Supplementary Figure S2                                    | Self-rotation function data                             |
| Supplementary Figure S3                                    | Alignments of N-termini of yeast CCT subunits           |
| Supplementary Figure S4                                    | Differential occupancy of nucleotide pockets            |
| Supplementary Figure S5                                    | Residual density in CCT complex cavity                  |
| Supplementary Figure S6                                    | Signature residues mapped onto CCT structure            |
| Reference list for Supplementary Tables and Figure legends |                                                         |

## Supplementary Table I

### Data collection statistics

|                                        |                                                                                          |
|----------------------------------------|------------------------------------------------------------------------------------------|
| Beam line                              | SLS -X06SA (detector: PILATUS)                                                           |
| Wavelength                             | 1.0001Å                                                                                  |
| Oscillation                            | 0.5°                                                                                     |
| Crystal Mosaicity                      | 0.22°                                                                                    |
| Spacegroup                             | P1                                                                                       |
| Unit cell dimensions                   | a=159.1Å b=162.5Å c=268.1Å<br>$\alpha=85.2^\circ$ $\beta=81.1^\circ$ $\gamma=61.2^\circ$ |
| # Reflections*<br>(observed/unique)    | 392,007 / 209,755                                                                        |
| Resolution limits (Å) (high res shell) | 85 – 3.8 (4.0-3.8)                                                                       |
| Completeness (high res shell)          | 91.6% (93.2%)                                                                            |
| Mean(I/sigI) (high res shell)          | 8.41 (1.92)                                                                              |
| Rsym (high res shell)                  | 7.7% (39.2%)                                                                             |

### Refinement Statistics\*\*

|                                          |                                                                                                                                                                |
|------------------------------------------|----------------------------------------------------------------------------------------------------------------------------------------------------------------|
| R work                                   | 30.7%                                                                                                                                                          |
| R free                                   | 34.4%                                                                                                                                                          |
| Deviations                               | 0.003 bonds/ 0.687 angles                                                                                                                                      |
| Ramachandran plot                        | 85.6% preferred<br>9.7% allowed<br>4.7% outliers                                                                                                               |
| Residues in model<br>(total in sequence) | Cct1 8-557 (559)<br>Cct2 3-518 (527)<br>Cct3 6-531 (534)<br>Cct4 7-528 (528)<br>Cct5 30-559 (562)<br>Cct6 1-544 (546)<br>Cct7 16-530 (550)<br>Cct8 5-538 (568) |

\* as output by XDS integration and scaling programs <sup>1</sup>

\*\* using PHENIX refinement software <sup>2</sup>

## Supplementary Table II

Signature residues per subunit and per domain, with yeast CCT residue numbering

| Subunit             | Cct1                                                                                                                  | Cct2                                                                                                                                                                         | Cct3                                                                      | Cct4                                                                                                                                                                                    | Cct5                                                                                            | Cct6                                                                                                                                                   | Cct7                                                                                                                                                                                    | Cct8                                     |
|---------------------|-----------------------------------------------------------------------------------------------------------------------|------------------------------------------------------------------------------------------------------------------------------------------------------------------------------|---------------------------------------------------------------------------|-----------------------------------------------------------------------------------------------------------------------------------------------------------------------------------------|-------------------------------------------------------------------------------------------------|--------------------------------------------------------------------------------------------------------------------------------------------------------|-----------------------------------------------------------------------------------------------------------------------------------------------------------------------------------------|------------------------------------------|
| Equatorial          | 28 Gln                                                                                                                | 12 Glu<br>32 Leu                                                                                                                                                             | 56 Val<br>77 Ser<br>131 Asp                                               | 89 Ala                                                                                                                                                                                  | 78 Asp                                                                                          | 28 Gly<br>36 Asn<br>42 Thr<br>54 Lys<br>72 Thr<br>77 Ala<br>116 Arg                                                                                    | 21 Gln<br>113 Lys<br>114 Pro                                                                                                                                                            | 52 Asn<br>57 Asn<br>126 Glu              |
| Intermediate        | 198 Tyr                                                                                                               | 152 Asp<br>166 Leu<br>183 Arg<br>186 Gly                                                                                                                                     | 197 Glu                                                                   |                                                                                                                                                                                         |                                                                                                 | 137 Lys<br>166 Leu                                                                                                                                     | 161 Cys                                                                                                                                                                                 | 175 Glu<br>191 Pro                       |
| Apical              | 204 Asn<br>206 Leu<br>208 Ala<br>209 His<br>222 Tyr<br>274 Arg<br>311 Val<br>312 Glu<br>346 Gly<br>350 Phe<br>360 Glu | 209 Asp<br>236 Thr<br>259 Ala<br>262 Glu<br>287 Arg<br>288 Gln<br>289 Leu<br>291 Tyr<br>294 Pro<br>295 Glu<br>307 Glu<br>308 His<br>310 Asp<br>311 Phe<br>313 Gly<br>357 Ser | 203 Tyr<br>236 Arg<br>242 Arg<br>255 Gly<br>266 Glu<br>292 Pro<br>298 Glu | 203 Thr<br>208 Glu<br>237 Ile<br>238 Gln<br>257 Tyr<br>266 Glu<br>283 Cys<br>291 Ser<br>292 Ile<br>293 Leu<br>294 Arg<br>295 Asp<br>296 Ala<br>315 Asp<br>317 Glu<br>334 Ala<br>339 Phe | 323 Cys<br>325 Trp<br>330 Glu<br>332 Asn<br>340 Leu<br>341 Pro<br>345 Trp<br>347 Gly<br>348 Gly | 195 Glu<br>197 Met<br>199 Met<br>201 His<br>217 His<br>218 Gly<br>220 Arg<br>223 Asp<br>243 Glu<br>259 Arg<br>284 Val<br>303 Pro<br>324 Asn<br>336 Ala | 200 Gly<br>202 Lys<br>226 Tyr<br>228 Gly<br>229 Phe<br>247 Glu<br>253 Glu<br>257 Ala<br>258 Glu<br>275 Trp<br>295 Ser<br>297 Leu<br>304 Thr<br>313 Phe<br>315 Ala<br>316 Gly<br>363 Asn | 234 Gly<br>263 Gly<br>266 Leu<br>292 Ala |
| Intermediate        | 398 Met                                                                                                               | 391 Leu                                                                                                                                                                      | 385 Ser<br>395 Asn<br>410 Pro                                             |                                                                                                                                                                                         |                                                                                                 | 393 Asp<br>400 Arg                                                                                                                                     | 398 Met<br>399 Ile                                                                                                                                                                      | 402 Asp                                  |
| Equatorial          | 526 Lys                                                                                                               | 506 Glu                                                                                                                                                                      | 441 Pro<br>442 Tyr<br>486 Gly<br>512 Thr<br>528 Ser                       | 484 Val<br>506 Ser                                                                                                                                                                      | 459 Asp<br>502 Gln<br>537 Gln<br>543 Gln                                                        | 476 Glu<br>529 Leu                                                                                                                                     | 466 Asn<br>523 Thr                                                                                                                                                                      | 479 Tyr<br>543 Gln                       |
| <b>TOTAL</b>        | <b>15</b>                                                                                                             | <b>24</b>                                                                                                                                                                    | <b>19</b>                                                                 | <b>20</b>                                                                                                                                                                               | <b>14</b>                                                                                       | <b>27</b>                                                                                                                                              | <b>25</b>                                                                                                                                                                               | <b>12</b>                                |
| <b>TOTAL apical</b> | <b>11</b>                                                                                                             | <b>16</b>                                                                                                                                                                    | <b>7</b>                                                                  | <b>17</b>                                                                                                                                                                               | <b>9</b>                                                                                        | <b>14</b>                                                                                                                                              | <b>17</b>                                                                                                                                                                               | <b>4</b>                                 |

Alignments were performed as described <sup>3</sup> using T-Coffee <sup>4</sup>

## FIGURE LEGENDS SUPPLEMENTARY FIGURES

### Supplementary Figure S1

Purification of CCT rabbit  $\alpha$ -actin Plp2 complex. **A.** CCT (i.e. CCT-3CBP-ANC2) was ATP-treated to release remaining bound substrates <sup>5,6</sup>, and purified using a Superose 6 gel filtration column. Shown are fractions 10-16 on a 12% SDS gel, with all eight CCT subunits running around the 60kDa mark. **B.** The pure and 'empty' CCT was then used to bind EDTA-unfolded  $\alpha$ -actin in the presence of yeast Plp2 and purified again by gel filtration. Since  $\alpha$ -actin is not released by yeast CCT <sup>7</sup>, this leads to a stable ternary complex, as shown by the peak fractions on the gel. Note that, from the fraction numbers, the ternary complex runs at a slightly lower elution volume than empty CCT in panel **A.** **C.** Western blot analyses of different gel filtration runs, using anti-His antibody against His-tagged Plp2 <sup>6</sup>. Also, CBP-tagged CCT reacts due to the His sequence in the tag-linker <sup>5</sup>. The blot shows that Plp2-binding to CCT is stronger in the presence of  $\alpha$ -actin, and supports the notion that the CCT-Plp2- $\alpha$ -actin complex forms a stable ternary complex. **D.** Multiple tiny crystals out of a total of 13 drops were transferred to a CoStar tube with 0.22 $\mu$ m filter, washed with well solution and dissolved in SDS sample buffer and analysed on a silverstained 10% SDS gel. The high PEG8k and glycerol content of both crystals and well solution results in a wavy appearance of the bands. The difference in intensity for the eight CCT bands and the actin and Plp2 bands reflects the mass ratio of 1:23 for one actin molecule binding to 16 CCT subunits. The presence of Plp2 was also confirmed by Western blot analysis. **E.** When loading 1/8th of the sample volume in **D**, the individual bands of CCT subunits become discernable. **F, G, H** illustrate typical 2Fo-Fc densities

within different subunits, which are characteristic of a 3.8Å density map, namely Cct6 (**F**), Cct2 (**G**) and Cct8 (**H**).

### **Supplementary Figure S2**

Self-rotation function data. **A.** Self-rotation plot at  $\text{Chi} = 180$  for CCT data as calculated by Molrep (CCP4<sup>8</sup>) using data from 8-15Å and a radius of 50Å. The strongest peak arises from the 2-fold axis relating the two molecules to each other (RF=10.6). The next two highest peaks are significantly stronger than all other remaining peaks (RF=8.4 and 6.6 as compared with  $\text{RF} \leq 5.2$ ), and indicate the presence of two proper 2-fold axes as opposed to the remaining pseudo 2-fold axes. The position of these two stronger peaks is consistent with the orientation of the Cct4-Cct6 axes of the two molecules relative to each other in the unit cell. **B.** Self-rotation plot for the theoretical case of  $\alpha$ -CPN in the same unit cell as CCT, showing eight equivalent proper 2-fold axes per molecule, due to eight identical subunits per ring. **C.** Schematic representation of the two molecules in the P1 unit cell with, for each case a proper 2-fold axis going through a plane dissecting Cct4-Cct6.

### **Supplementary Figure S3**

**A.** Alignments of N-termini of the eight yeast Cct subunits. **B.** Alignments of the N-termini of yeast, worm, mouse and human CCT5 subunits.

### **Supplementary Figure S4**

Differential nucleotide occupancy of the nucleotide pockets illustrated for subunit Cct2 where an ADP-BeF molecule was modelled (**A**) and subunit Cct4 where a sulphate ion was modelled (**B**). Density of the (2Fo-Fc) map is shown at 1.2 sigma.

### **Supplementary Figure S5**

**A.** CCT, shown as the entire complex, and **B.** as a slice through the complex with ncs-averaged density superposed (see CCT actin section in manuscript and legend to Figure 4A) to highlight the asymmetric distribution of residual density, both with respect to the cavity and to the entire complex. The lower cavity reveals some density, but it is not as substantial and contiguous as in the upper cavity. Furthermore, the density in the lower cavity has no discernable protein features, like  $\beta$ -strands, unlike the density in the upper cavity.

### **Supplementary Figure S6**

**A-B.** Signature residues <sup>3</sup> mapped onto the structure of the CCT complex (apical domains only) in its closed conformation. **A** is the view from the outside of the complex, possibly indicating residues involved in co-factor binding. **B** is the view from inside the cavity, showing residues possibly involved with substrate interaction. **C.** Consensus sequence based on an alignment of all eight yeast CCT subunits mapped onto the 3D structure of a single CCT chain, with fully conserved residues in red, conserved substitutions in orange and semi-conserved substitutions in green. Nucleotide is shown in yellow. **C-K.** Signature residues for each Cct subunit mapped onto its structure. Shown in red are the residues that are fully conserved amongst orthologues with no identity score amongst paralogues. All figures were produced in Pymol<sup>9</sup>.

### **References for Supplementary Tables I, II and Legends to Supplementary Figures 1-6**

1. Kabsch, W. Automatic-Indexing of Rotation Diffraction Patterns. *Journal of Applied Crystallography* 21, 67-71 (1988).
2. Adams, P. D. et al. PHENIX: building new software for automated crystallographic structure determination. *Acta Cryst. D58, 1948-1954* (2002).

3. Pappenberger, G. et al. Crystal structure of the CCT gamma apical domain: Implications for substrate binding to the eukaryotic cytosolic chaperonin. *Journal of Molecular Biology* 318, 1367-1379 (2002).
4. Notredame, C., Higgins, D. G. & Heringa, J. T-Coffee: A novel method for fast and accurate multiple sequence alignment. *Journal of Molecular Biology* 302, 205-217 (2000).
5. Pappenberger, G., McCormack, E. A. & Willison, K. R. Quantitative actin folding reactions using yeast CCT purified via an internal tag in the CCT3/gamma subunit. *Journal of Molecular Biology* 360, 484-496 (2006).
6. McCormack, E. A., Altschuler, G. M., Dekker, C., Filmore, H. & Willison, K. R. Yeast phosducin-like protein 2 acts as a stimulatory co-factor for the folding of actin by the chaperonin CCT via a ternary complex. *Journal of Molecular Biology* 391, 192-206 (2009).
7. Altschuler, G. M. et al. A single amino acid residue is responsible for species-specific incompatibility between CCT and alpha-actin. *Febs Letters* 583, 782-786 (2009).
8. CCP4. Collaborative Computational Project No. 4: The CCP4 suite: programs for protein crystallography. *Acta Cryst. D*50, 760-763 (1994).
9. DeLano, W. L. The PyMOL Molecular Graphics System. DeLano Scientific, San Carlos, CA, USA, <http://www.pymol.org>. (2002).

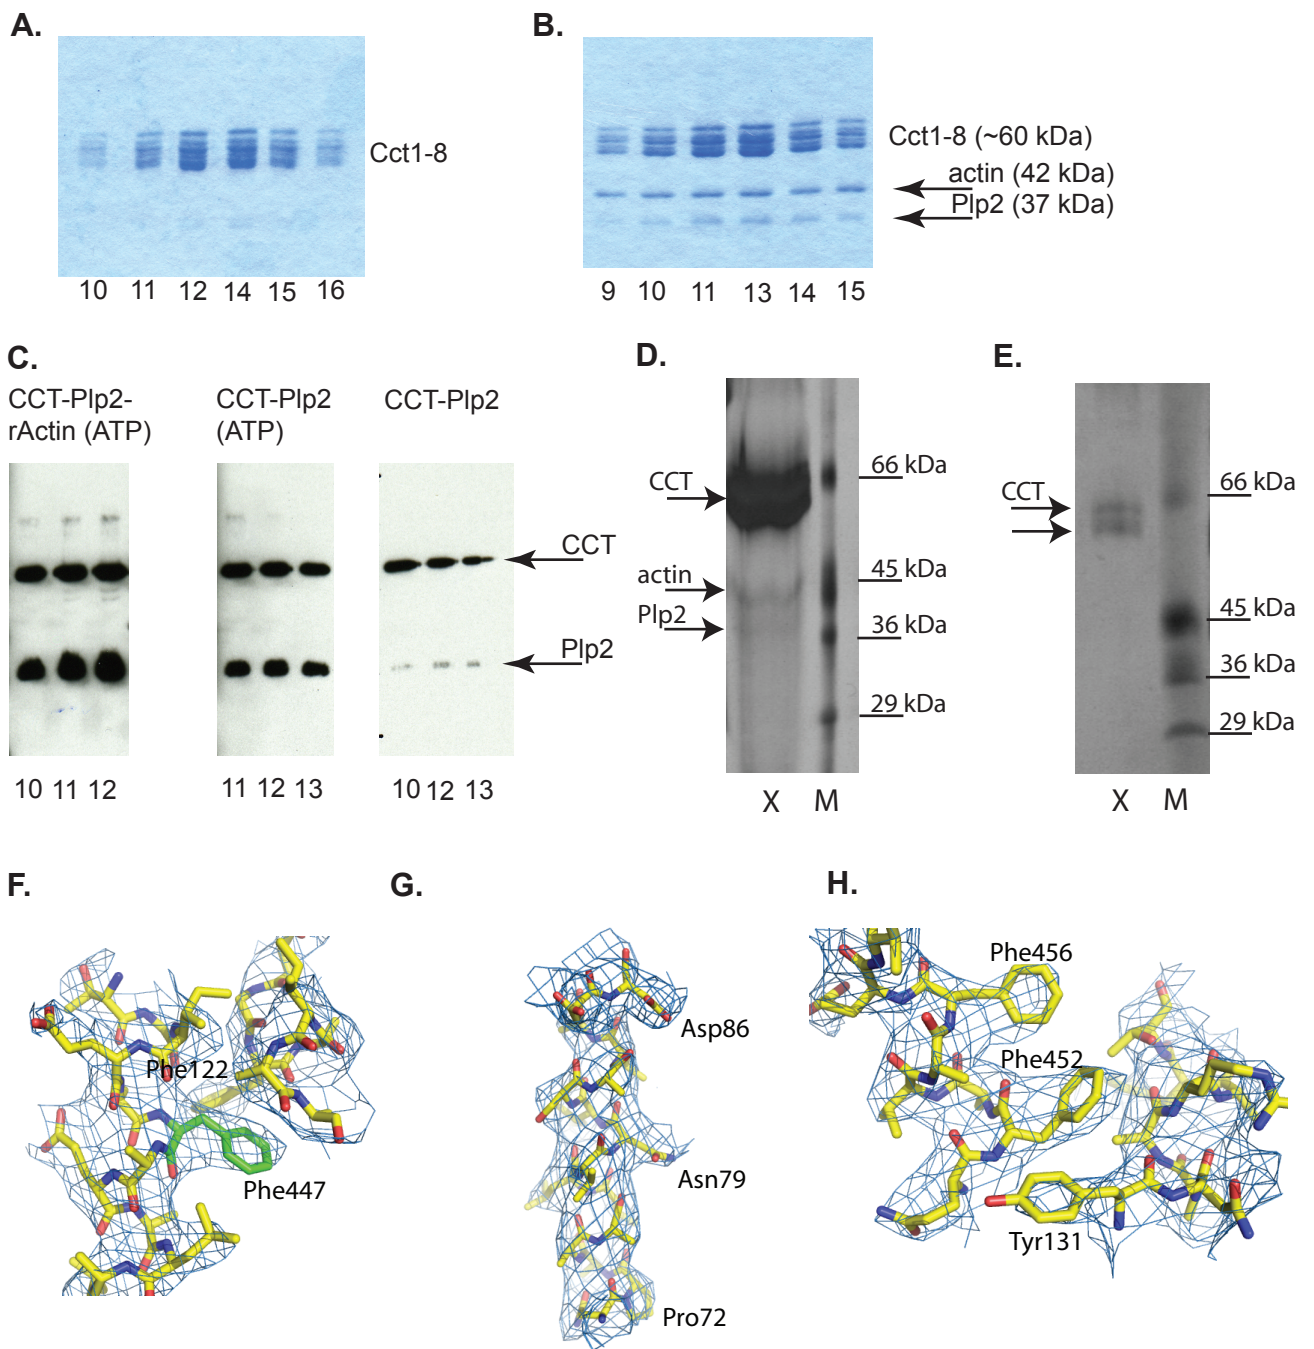

Supplementary Figure S1.



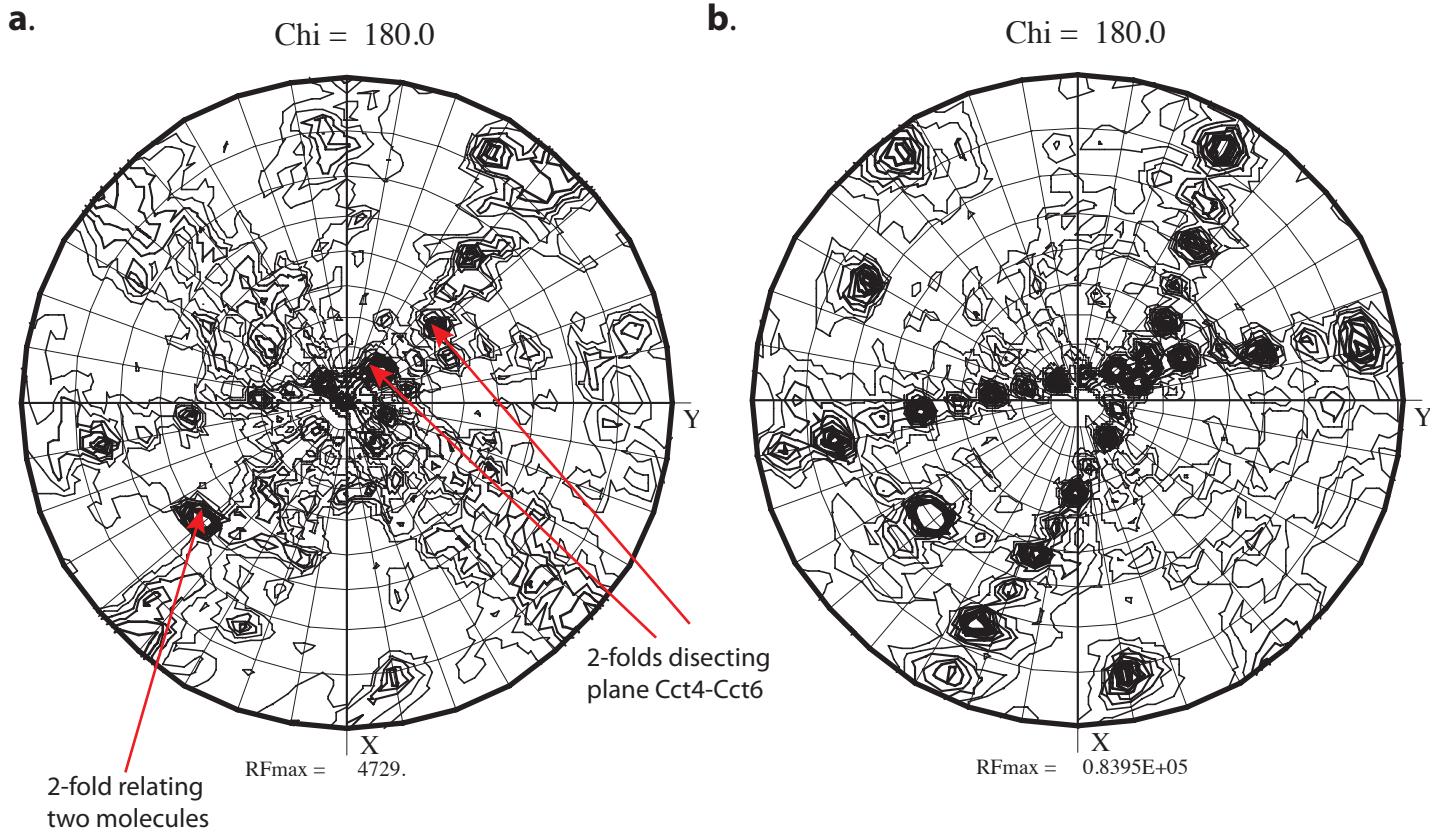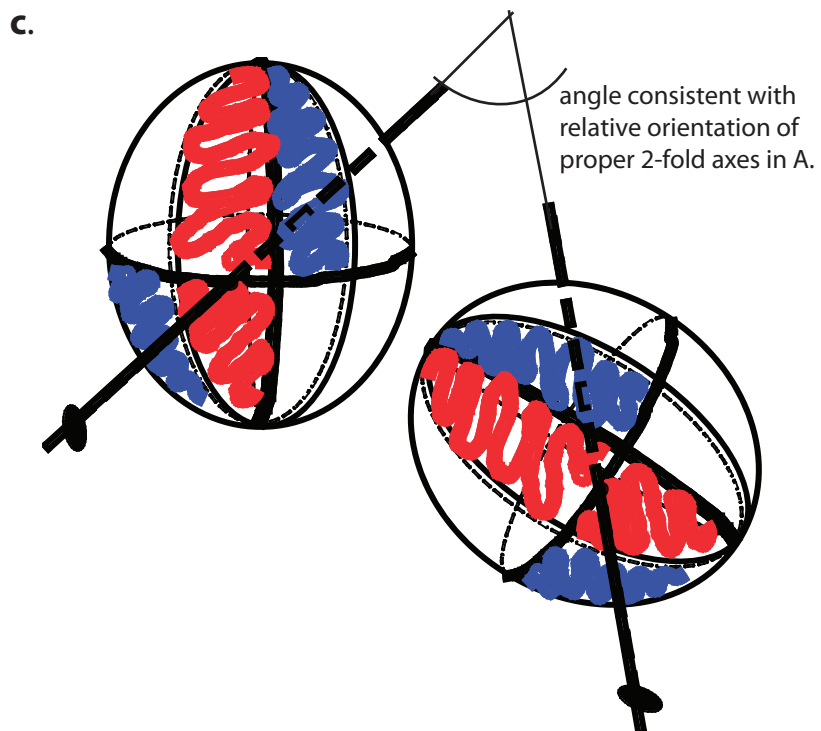

Supplementary Figure S2.

## A.

```
Sc - CCT1 ----- MSQLFNNSRSDTLFLGG -- EKISGDDIRNQN VLA TMAVANVVK SSLGP
Sc - CCT2 ----- MSVQIFGDQV ----- TE-- ER-- AENARLSA FVGAI AVGDLVK STLGP
Sc - CCT3 ----- MQAPV ----- VFMNA ----- S-QERTTGRQAQISN ITAAKAVADVIR TCLGP
Sc - CCT4 ----- MSAK ----- VPSNAT ----- F-KNKEKPQEVRRKAN IIAARSVADAIR TSLGP
Sc - CCT5 MAARPQQPP MEMPDLSNAIVAQDEMGRPFIIVKDQG ----- N-KKRQHGLEAKKSH ILAARSVASIIK TSLGP
Sc - CCT6 ----- MSLQLLNPK ----- AESLRRDAALKVN VTSAEGLQSVLE TNLGP
Sc - CCT7 ----- MNFGSQTP TIVVLKEG -TDASQGGQIISN INACVAVQEALK PTLGP
Sc - CCT8 ----- MSLRLPQNPAGL FKQGYN SYSNADGQIIKS IAAIRELHQMCL TSMGP
```

## B.

```
SACEREV MAARPQQPPMEMPDLSNAI VAQDEMGRPFIIVKDQGNKKRQHGLEAKKSHILAARSVASIIKTSLGP
CAENELE -----MAQSSAQLLFDESCQPFIVMREQENQKRITGVEAVKSHILAARAVANTLRTSLGP
MUSMUSC -----MASVGT LAFDEYGRPFLLIKDQDRKSLMGLEALKSHIMAAKAVANTMRTSLGP
HOMOSAP -----MASMGT LAFDEYGRPFLLIKDQDRKSLMGLEALKSHIMAAKAVANTMRTSLGP
```

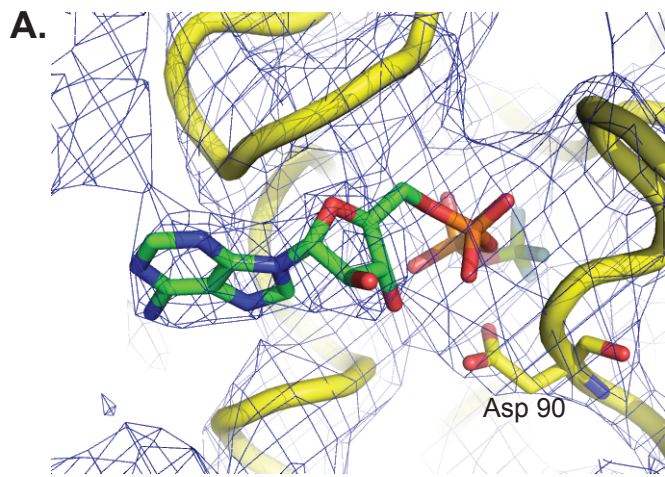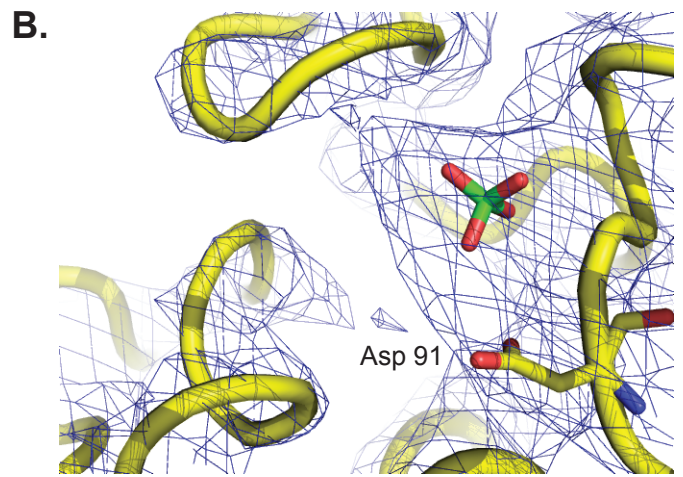

Suppl Figure S4.

A.

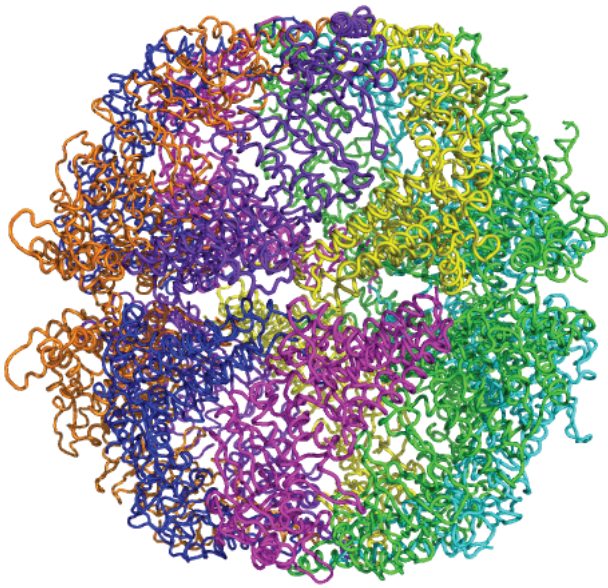

B.

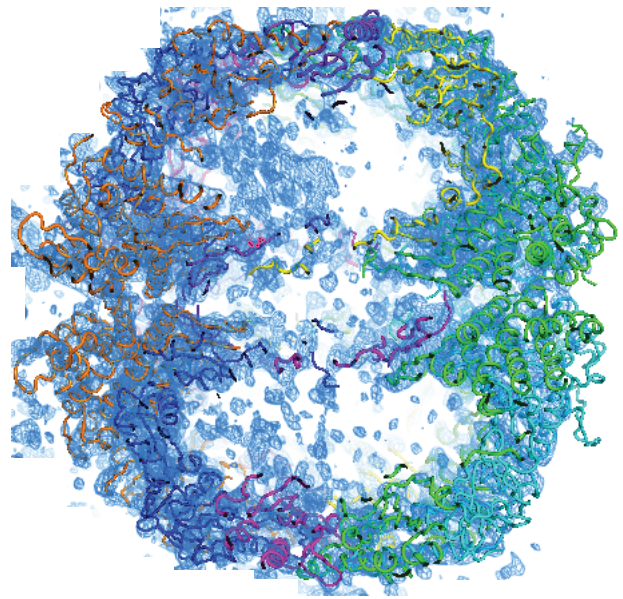

Supp Figure S5.

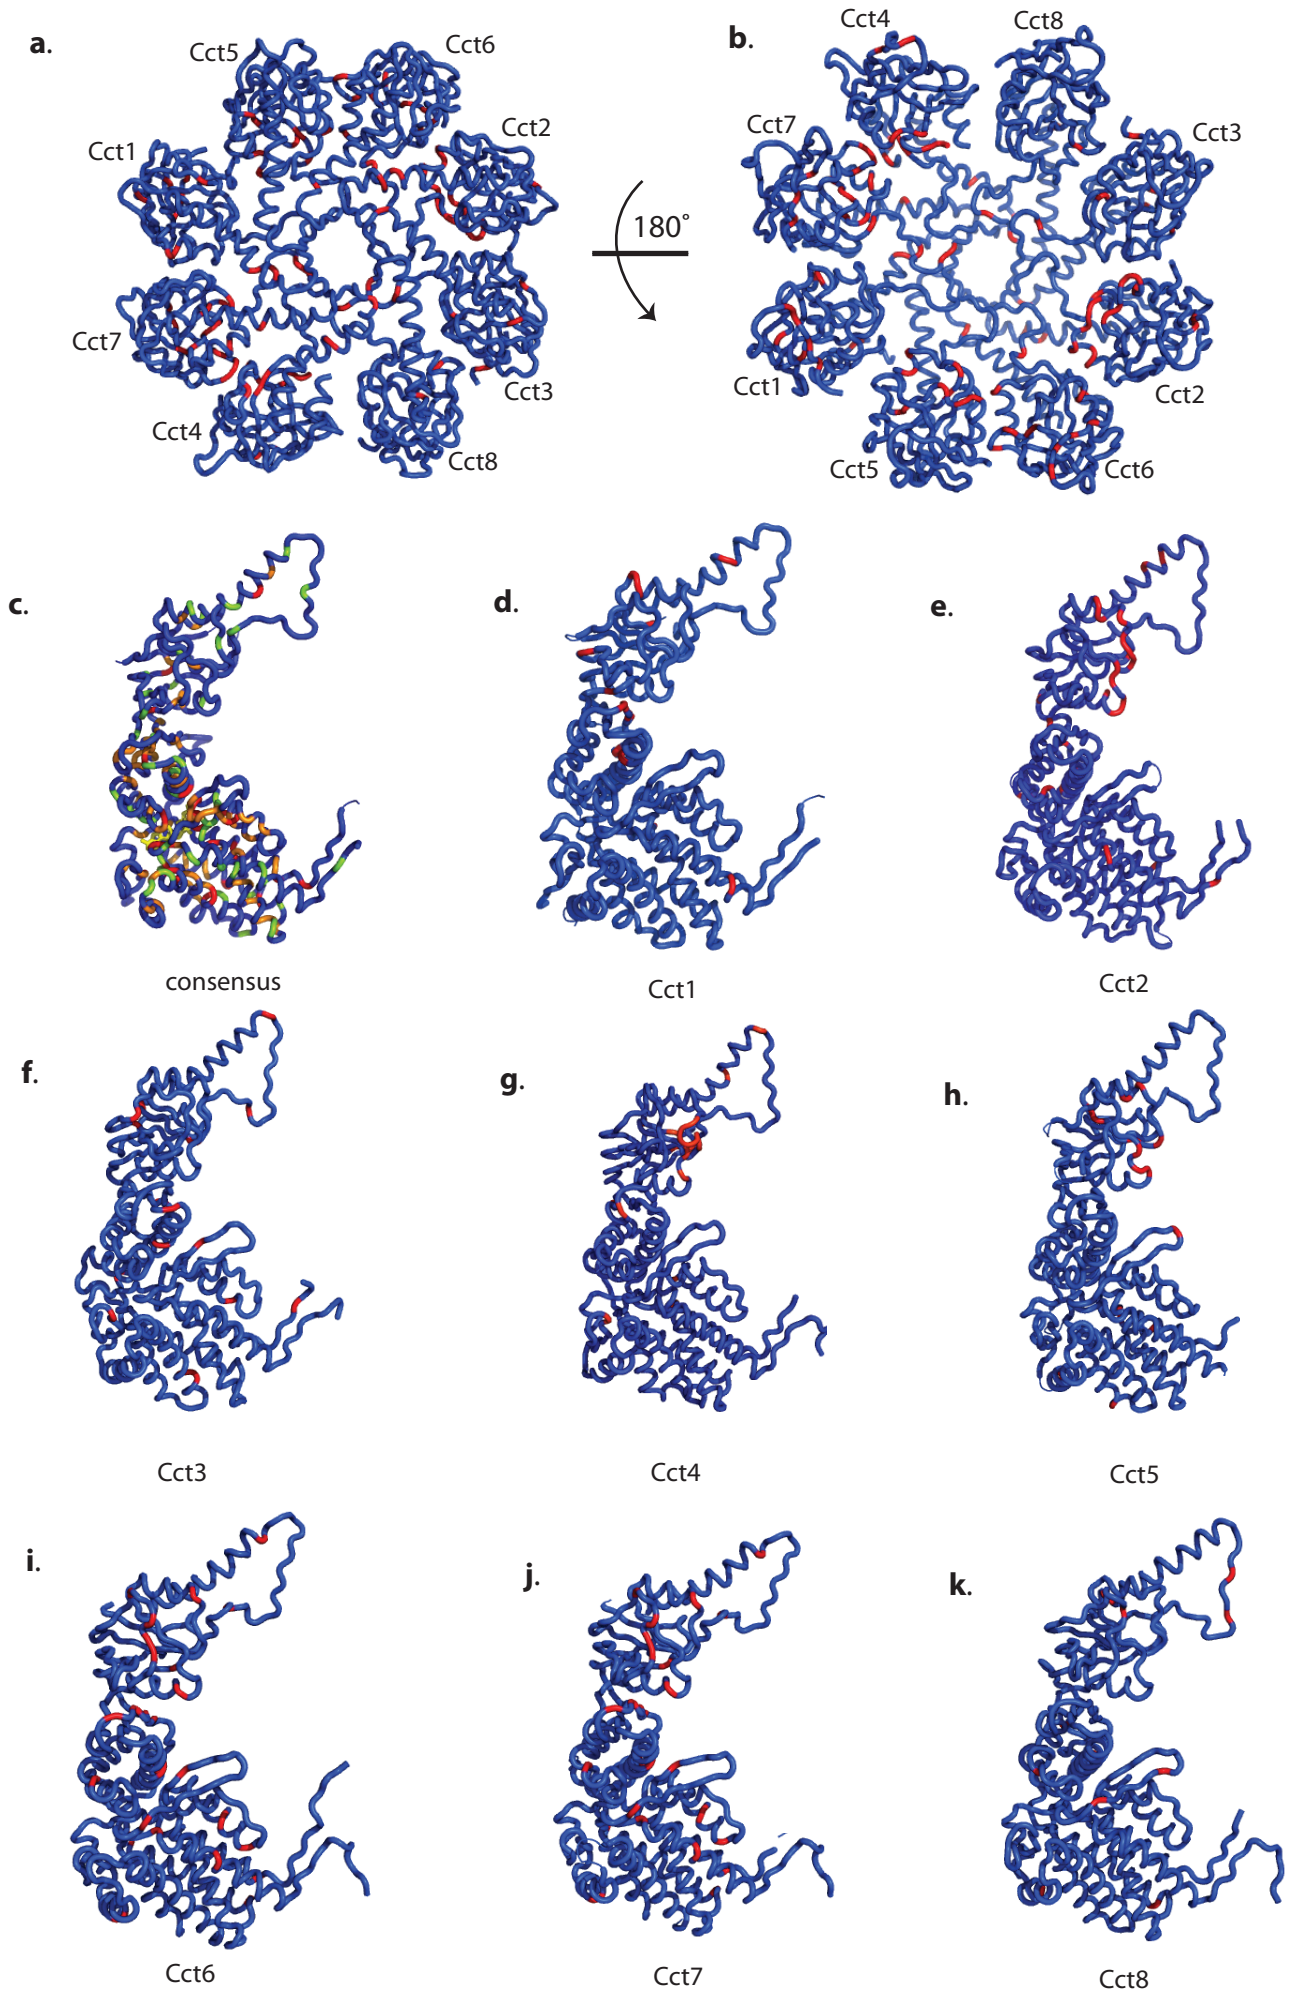

Supplementary Figure S6.
